# Supplementary material
Source: publisher figshare collection journal article supplement (https://acs.figshare.com/ndownloader/files/9410545)
Supplement: Supplementary file 1 [file 9410545]

**Supporting Information for**

# Nanotubular Iridium-Cobalt Mixed Oxide Crystalline Architectures Inherited from Cobalt Oxide for Highly Efficient Oxygen Evolution Reaction Catalysis

*Areum Yu,<sup>a</sup> Chongmok Lee,<sup>a</sup> Myung Hwa Kim,<sup>\*a</sup> Youngmi Lee<sup>\*a</sup>*

<sup>a</sup>Department of Chemistry and Nano Science, Ewha Womans University, Seoul, 03760, Korea

\*Co-corresponding authors: [youngmilee@ewha.ac.kr](mailto:youngmilee@ewha.ac.kr) (Y.L.); [myungkim@ewha.ac.kr](mailto:myungkim@ewha.ac.kr) (M.H.K.)

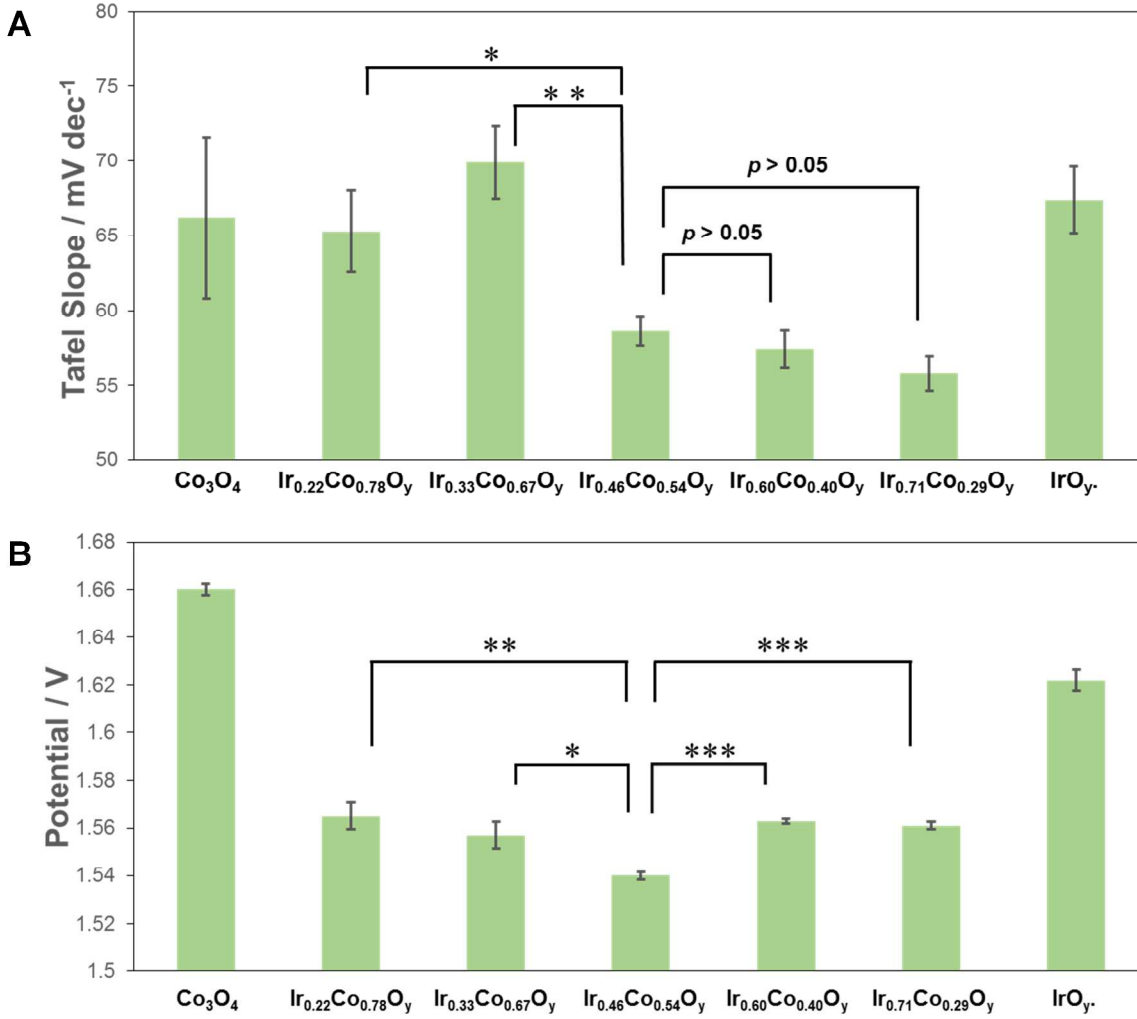

**Figure S1.** (A) The averaged Tafel slopes and (B) the averaged potentials at a current density of  $10 \text{ mA cm}^{-2}$  obtained from five repetitive measurements of various  $\text{Ir}_x\text{Co}_{1-x}\text{O}_y$  nanocomposites with  $0 \leq x \leq 1$ . The data values were compared statistically using paired *t*-test (\*\* $p < 0.001$ , \*\* $p < 0.01$ , \* $p < 0.05$ ).
